# Supplementary material
Source: PubMed Central journal article supplement (PMC9881456)
Supplement: NIHMS1860215-supplement-Supplementary_Material.pdf [file NIHMS1860215-supplement-Supplementary_Material.pdf]

## Supplemental Information

**Table S1. Treatments participants endorse receiving currently (~3 months in between each visit).** Data are number of subjects endorsing receiving the treatment at the current visit.

| Visit                                                                                   | 1  | 2  | 3  |
|-----------------------------------------------------------------------------------------|----|----|----|
| <b>Receiving medications as part of treatment (n)</b>                                   | 34 | 27 | 23 |
| Antidepressants                                                                         | 26 | 27 | 18 |
| Mood stabilizers                                                                        | 8  | 8  | 5  |
| Stimulants                                                                              | 2  | 1  | 0  |
| Sleep aids                                                                              | 9  | 6  | 4  |
| Benzodiazepines                                                                         | 7  | 4  | 4  |
| Antipsychotics                                                                          | 5  | 2  | 2  |
| Adrenergic blockers                                                                     | 12 | 5  | 2  |
| other                                                                                   | 4  | 3  | 5  |
| <b>Currently receiving psychotherapy (n)</b>                                            | 67 | 40 | 29 |
| Group Psychotherapy                                                                     | 17 | 9  | 11 |
| Individual                                                                              | 59 | 35 | 26 |
| Family                                                                                  | 1  | 0  | 0  |
| Couples                                                                                 | 6  | 1  | 2  |
| <b>If you currently receive group therapy, which treatment do you receive? (n)</b>      |    |    |    |
| CBT for Anxiety                                                                         | 11 | 6  | 4  |
| CBT for Depression                                                                      | 12 | 7  | 8  |
| CBT for Insomnia                                                                        | 0  | 0  | 0  |
| Imagery Rehearsal Training for Nightmares                                               | 1  | 0  | 0  |
| CBT for Bipolar Disorder                                                                | 3  | 2  | 2  |
| Cognitive Processing Therapy                                                            | 7  | 3  | 2  |
| Anger Management                                                                        | 2  | 3  | 3  |
| Acceptance and Commitment Therapy                                                       | 2  | 1  | 1  |
| Other                                                                                   | 8  | 5  | 6  |
| <b>If you currently receive individual therapy, which treatment do you receive? (n)</b> |    |    |    |
| CBT for Anxiety                                                                         | 21 | 12 | 8  |
| CBT for Depression                                                                      | 25 | 17 | 15 |
| CBT for Insomnia                                                                        | 5  | 2  | 1  |
| Imagery Rehearsal Training for Nightmares                                               | 5  | 0  | 1  |
| Cognitive Processing Therapy                                                            | 12 | 8  | 6  |
| Prolonged Exposure                                                                      | 7  | 5  | 2  |
| Eye Movement Desensitization and Reprocessing (EMDR)                                    | 2  | 1  | 2  |
| Acceptance and Commitment Therapy                                                       | 1  | 3  | 2  |
| Anger Management                                                                        | 4  | 5  | 1  |
| Other                                                                                   | 10 | 6  | 6  |

CBT=Cognitive Behavioral Therapy

|                                | Parental monitoring | Parental predictability | Parental environment | Physical environment | Safety security | HEQ_overall score |
|--------------------------------|---------------------|-------------------------|----------------------|----------------------|-----------------|-------------------|
| Depression (PHQ-9)             | .182*               | .250**                  | 0.15                 | .235**               | .174*           | .239**            |
| Anhedonia (MASQ-22)            | .272**              | .218**                  | 0.115                | .184*                | 0.087           | .238**            |
| Anxiety (GAD-7)                | .182*               | .254**                  | .162*                | .196*                | .172*           | .234**            |
| PTSD (PCL-5)                   | 0.092               | .232**                  | 0.088                | .200*                | .175*           | .196*             |
| Suicidal Ideation Item (PHQ-9) | .217**              | .239**                  | .232**               | 0.147                | .224**          | .261**            |
| Suicidal Ideation Item (MASQ)  | .221**              | .279**                  | .179*                | 0.126                | .217**          | .273**            |
| Alcohol Use (AUDIT)            | -0.031              | 0.044                   | 0.128                | -0.028               | 0.053           | 0.019             |
| Pain Intensity (PROMIS)        | 0.132               | 0.095                   | -0.039               | 0.056                | 0.043           | 0.073             |
| Pain Interference (PROMIS)     | 0.128               | 0.075                   | 0.005                | 0.125                | 0.026           | 0.078             |

\*\* Correlation is significant at the 0.01 level (2-tailed).

\* Correlation is significant at the 0.05 level (2-tailed).

Table S2. Correlations between QUIC subscales and Time 1 symptom scores (N=156)

|                         | Emotional Abuse | Physical Abuse | Sexual Abuse | Emotional Neglect | Physical Neglect | Minimization/ Denial Scale^ | CTQ abuse total |
|-------------------------|-----------------|----------------|--------------|-------------------|------------------|-----------------------------|-----------------|
| Parental monitoring     | .473**          | .399**         | .244**       | .605**            | .589**           | -.219**                     | .568**          |
| Parental predictability | .659**          | .624**         | .446**       | .630**            | .629**           | -.241**                     | .736**          |
| Parental environment    | .357**          | .326**         | .244**       | .374**            | .460**           | -.288**                     | .435**          |
| Physical environment    | .388**          | .346**         | .337**       | .375**            | .478**           | -.278**                     | .481**          |
| Safety security         | .540**          | .523**         | .360**       | .442**            | .633**           | -.234**                     | .598**          |
| QUIC total score        | .640**          | .597**         | .434**       | .658**            | .699**           | -.320**                     | .747**          |

^Minimization/ Denial Scale score reflects the tendency of the respondent to give exaggerated, desirable responses.

\*\* Correlation is significant at the 0.01 level (2-tailed).

\* Correlation is significant at the 0.05 level (2-tailed).

a visit\_number = 1 (N=147)

Table S3. Correlations between QUIC and CTQ subscales at Time 1 (N=147)

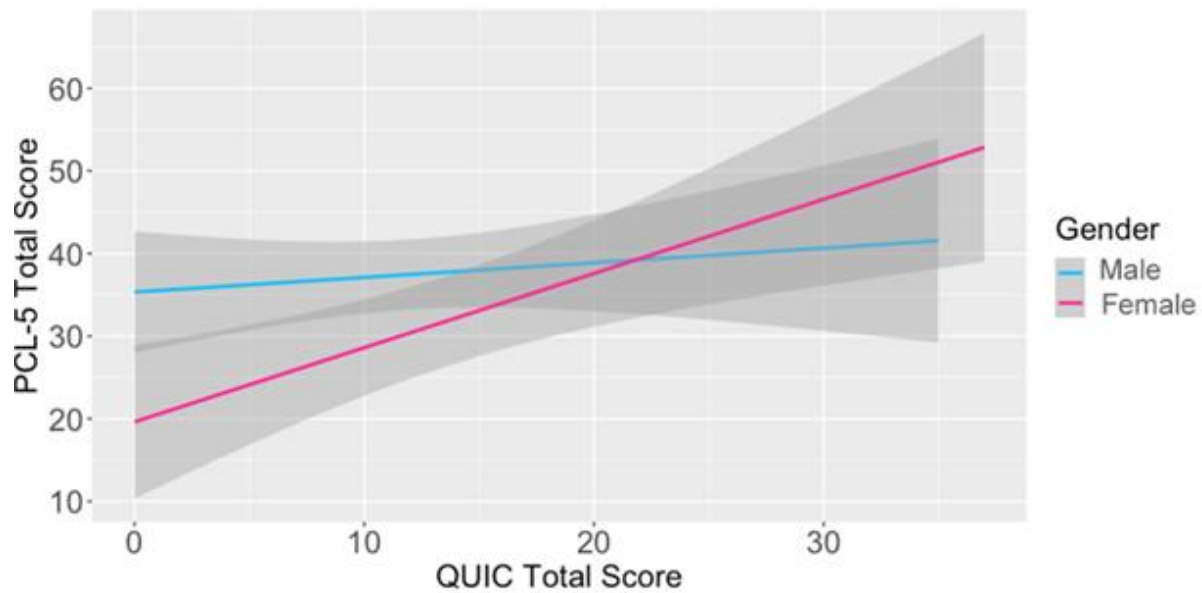

**Supplemental Figure S1. Early-life predictability has stronger association with PTSD**

**symptoms in females compared to males.** There was a trend level interaction for unpredictability by sex on the PCL-5 ( $p = .054$ ). When correlations were completed within each sex, women showed a higher positive correlation between QUIC totals and PCL-5 totals ( $n = 59$ ,  $r = .40$ ,  $p = .001$ ) as compared to men ( $n = 88$ ,  $r = .08$ ,  $p = .45$ ).

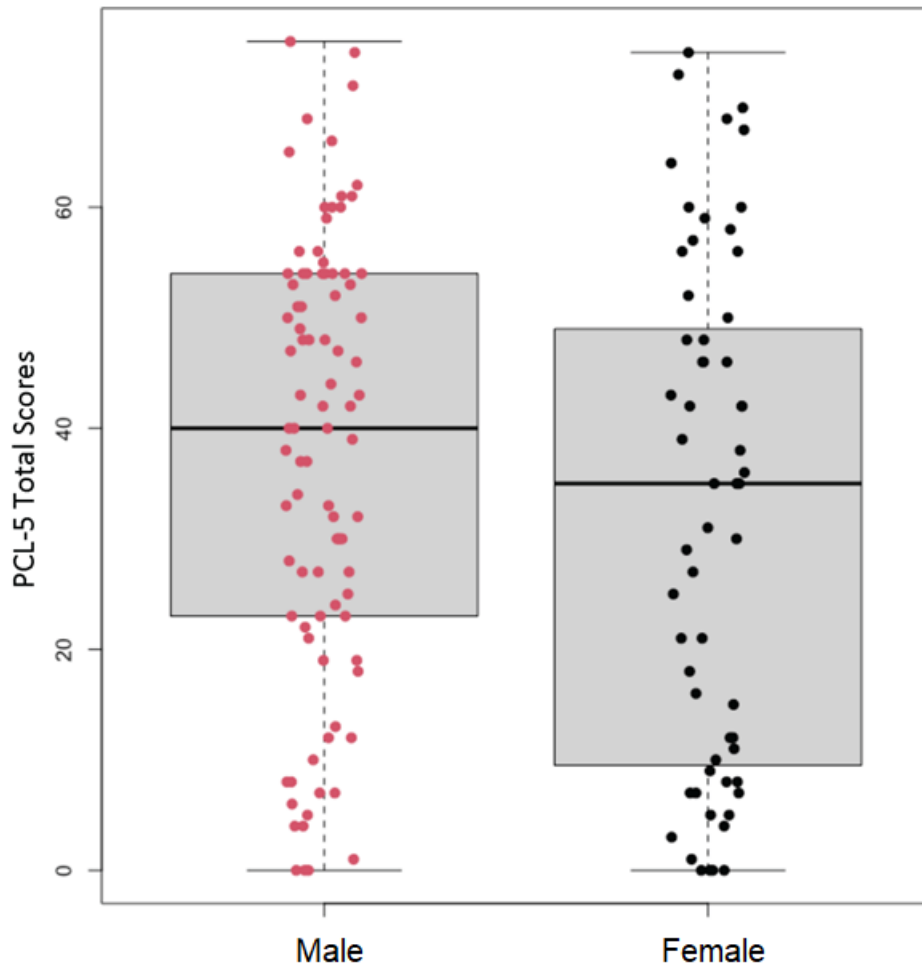

**Supplemental Figure S2. PCL-5 scores by gender.** There were not any significant gender differences in PCL-5 total scores ( $F(1,145) = 2.4, p = .12$ ) and Komolgorov-Smirnov tests indicated no difference in the distributions ( $D = 0.180, p\text{-value} = 0.204$ ), although women ( $n=59$ ) had slightly lower scores than men ( $n=88$ ) (Mean(SD)women=31.95 (22.70), Mean(SD)men=37.45 (20.00)).
